# Supplementary material
Source: HighWire-hosted journal article supplement (https://ejhp.bmj.com/highwire/filestream/153690/field_highwire_adjunct_files/0/ejhpharm-2022-003515supp001_data_supplement.pdf)
Supplement: ejhpharm-2022-003515supp001_data_supplement.pdf [file ejhpharm-2022-003515supp001_data_supplement.pdf]

**Supplementary File 1: Classification of incidents according to the DATIX reports****Administration related incidents**

- Drug incompatibility
- Incorrect day or time
- Incorrect dose
- Incorrect drug
- Incorrect frequency
- Incorrect rate
- Incorrect route
- Non-administration/dose omitted or significantly delayed
- Self-administration error
- Extravasation

**Discharge related incidents**

- Patient discharged with incomplete set of medication or no medication
- Patient discharged with unlabelled supplied of medication
- Delay in pharmacy processing of TTO
- Delay in prescribing of TTO

**Pharmacy related incidents**

- Incorrect directions on label
- Incorrect drug
- Incorrect form
- Incorrect information or pharmacy advice (endorsement on chart, verbal or written information)
- Incorrect quantity
- Incorrect strength
- Significant delay in supply or failure to supply (not TTOs)
- Clinical pharmacist screening error
- Unavailable medication stock
- Transcription error

**Prescribing related incidents**

- Failure to prescribe
- Incorrect dose
- Incorrect drug
- Incorrect route
- Incorrect frequency
- Incorrect day or time
- Incorrect rate
- Incorrect quantity

**Other incidents**

- Clinical trial error (prescribing, administration, dispensing, protocol violation)
- Contraindication to the use of the medicine
- Discrepancy in medication documentation records (CDs, drug chart, etc)
- Drug wastage (financial loss)
- Errors or delays with the medicines reconciliation process
- Incorrect injectable drug preparation: prescribing, administration, manufacturing (incorrect concentration/diluent, incorrect volume, incorrect drug/dose, incorrect label/details missing on label)
- Faulty medicinal product
- Incorrect monitoring/failure to monitor therapeutic levels
- Mismatching between patient and medicine (misidentification)
- Missing medication or drug chart
- New adverse drug reaction/unexpected response/oversensitivity to the drug
- Patient with known allergy prescribed or administered a drug they are allergic to
- Storage or transportation issues
- Wrong expiry/omitted expiry/passed expiry date
- Error with nurse supply of medication under a PGD or local agreement (pre-packs)
- Lost drug cupboard keys
